# Supplementary material for: Sjögren’s syndrome-associated microRNAs in CD14+ monocytes unveils targeted TGFβ signaling
Source: PubMed Central journal article supplement (PMC4855899; doi:10.1186/s13075-016-0987-0), 2016-05-03

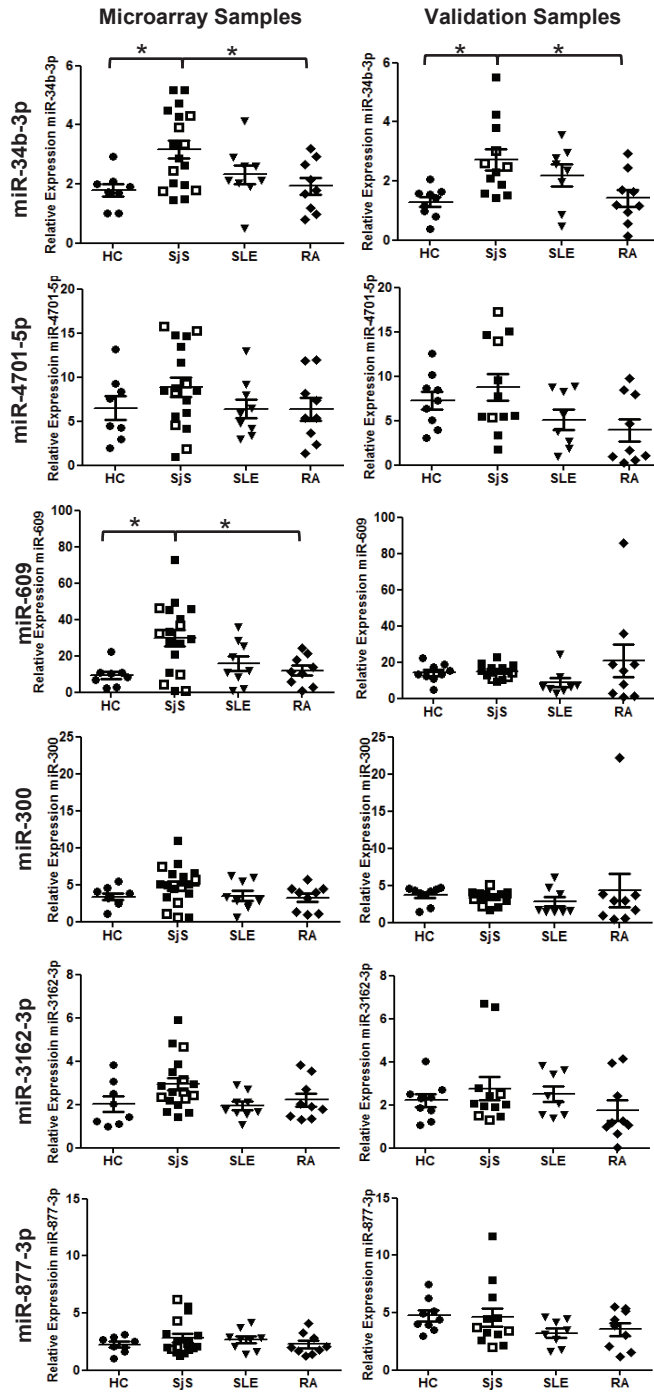

Supplement: 13075_2016_987_MOESM3_ESM.pdf [file 13075_2016_987_MOESM3_ESM.pdf]
