# Supplementary material for: Sjögren’s syndrome-associated microRNAs in CD14+ monocytes unveils targeted TGFβ signaling
Source: Springer Nature journal article supplement (doi:10.1186/s13075-016-0987-0), 2016-05-03

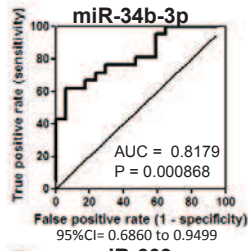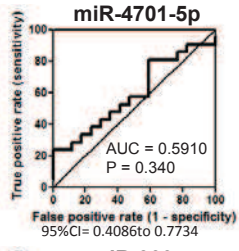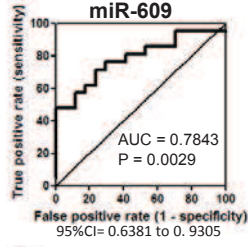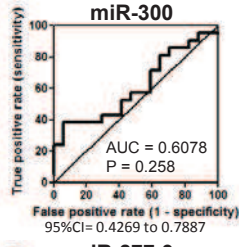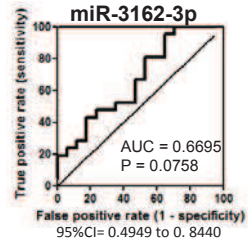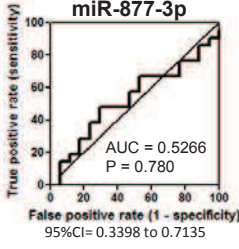

Supplement: MOESM4 [file 10111878]
